# Supplementary material for: Serum Galectin-3 as a Non-Invasive Marker for Primary Sclerosing Cholangitis
Source: MDPI journal article supplement (doi:10.3390/ijms25094765), 2024-04-27
Supplement: s1 [file s1]

# Serum Galectin-3 as a Non-Invasive Marker for Primary Sclerosing Cholangitis

Ganimete Bajraktari, Tanja Elger, Muriel Huss, Johanna Loibl, Andreas Albert, Arne Kandulski, Martina Müller, Hauke Christian Tews and Christa Buechler \*

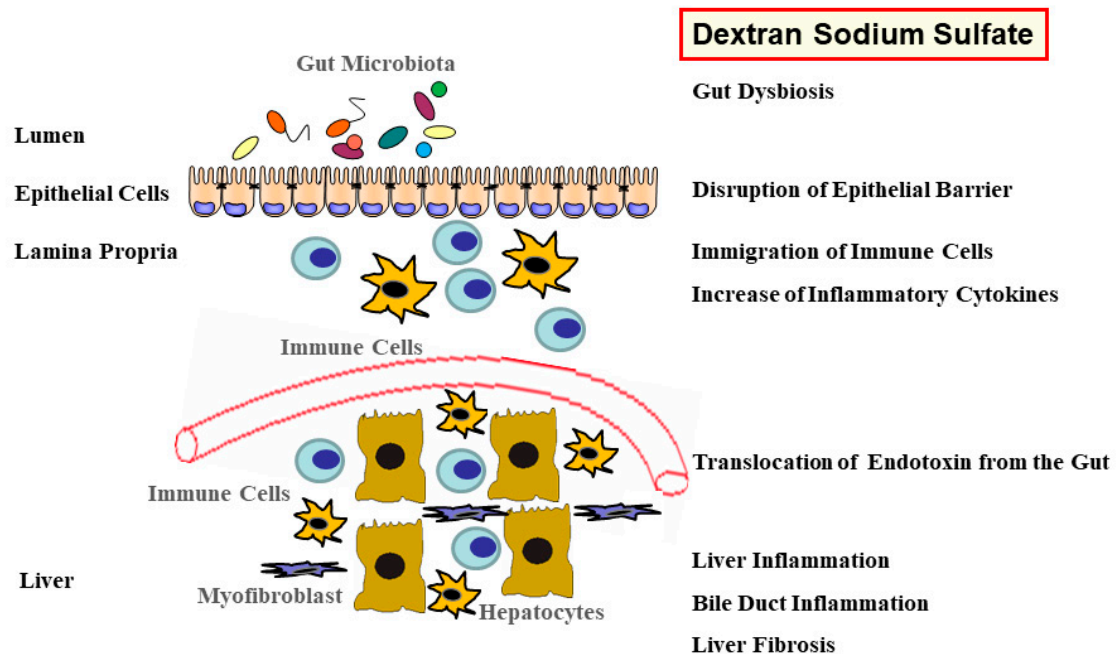

**Figure S1.** Schematic summary of the effect of dextran sodium sulfate in the gut and the liver.

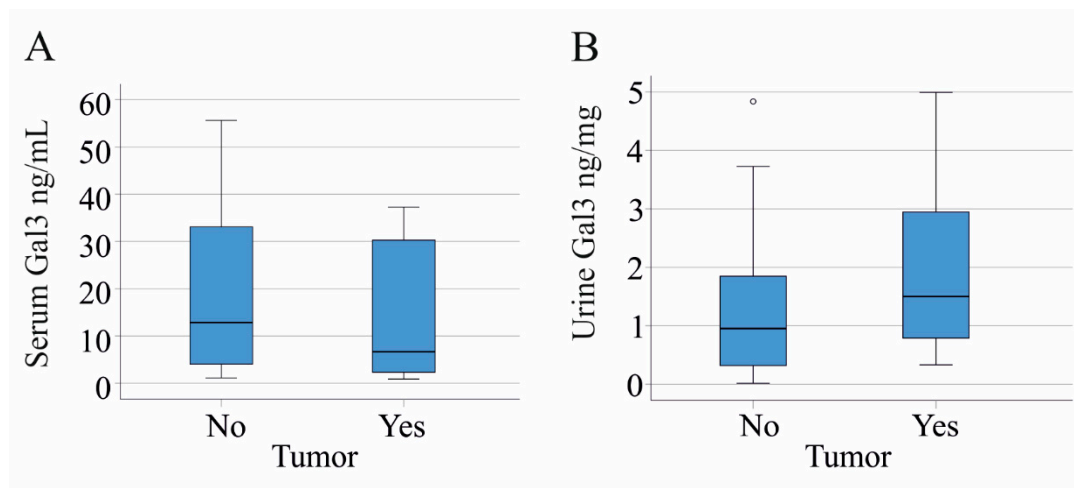

**Figure S2.** Serum and urinary galectin-3 (Gal3) of patients with inflammatory bowel disease who did develop tumors during therapy in comparison to patients who did not have tumors. (a) Serum Gal3; (b) Urinary Gal3.
